# Supplementary material
Source: MDPI journal article supplement (https://www.mdpi.com/2673-6918/2/2/8)
Supplement: s1 [file s1]

Article

# A Photoswitchable Chalcone-Carbohydrate Conjugate Obtained by CuAAC Click Reaction

Micael Paulino, Maria Manuela Araújo Pereira \* and Nuno Basílio \*

Laboratório Associado para a Química Verde (LAQV), Rede de Química e Tecnologia (REQUIMTE), Departamento de Química, Faculdade de Ciências e Tecnologia, Universidade NOVA de Lisboa, 2829-516 Caparica, Portugal; md.paulino@campus.fct.unl.pt

\* Correspondence: manuela.pereira@fct.unl.pt (M.M.A.P.); nuno.basilio@fct.unl.pt (N.B.); Tel.: +351-212-948-300 (M.M.A.P.)

## Supporting Information

### Spectroscopic Data

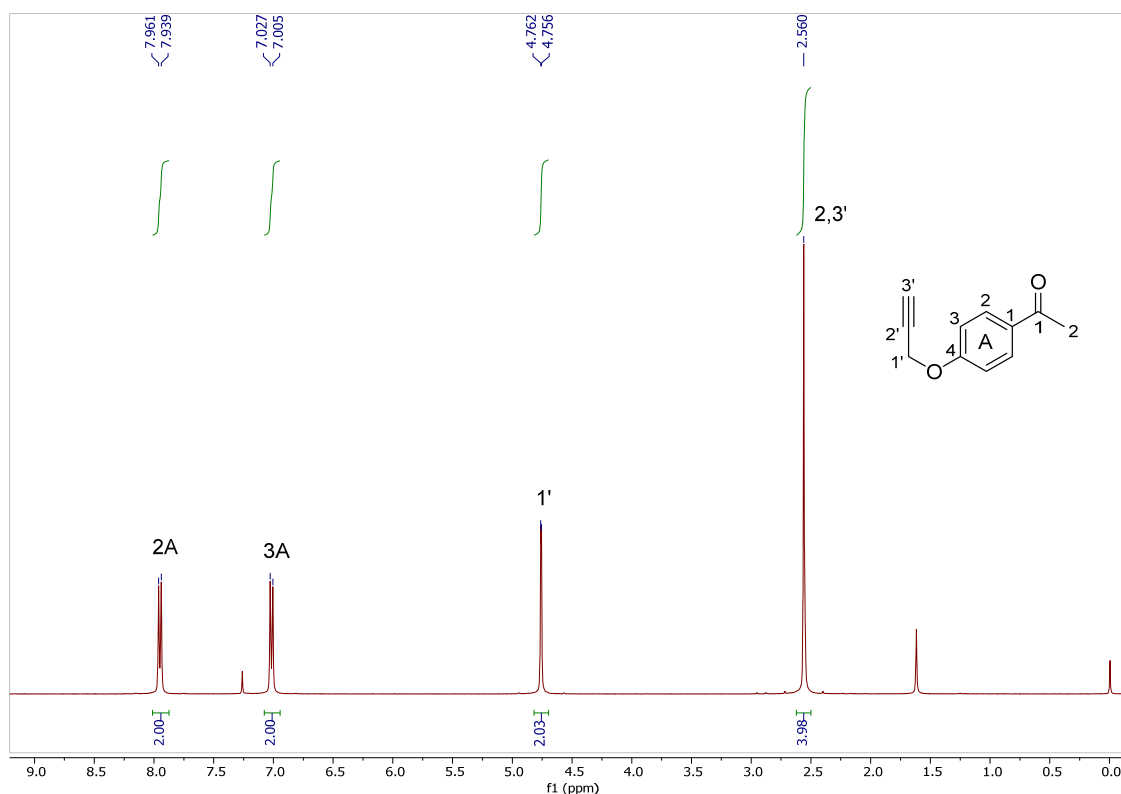

Figure S1. <sup>1</sup>H NMR of Compound 2 in CDCl<sub>3</sub>.

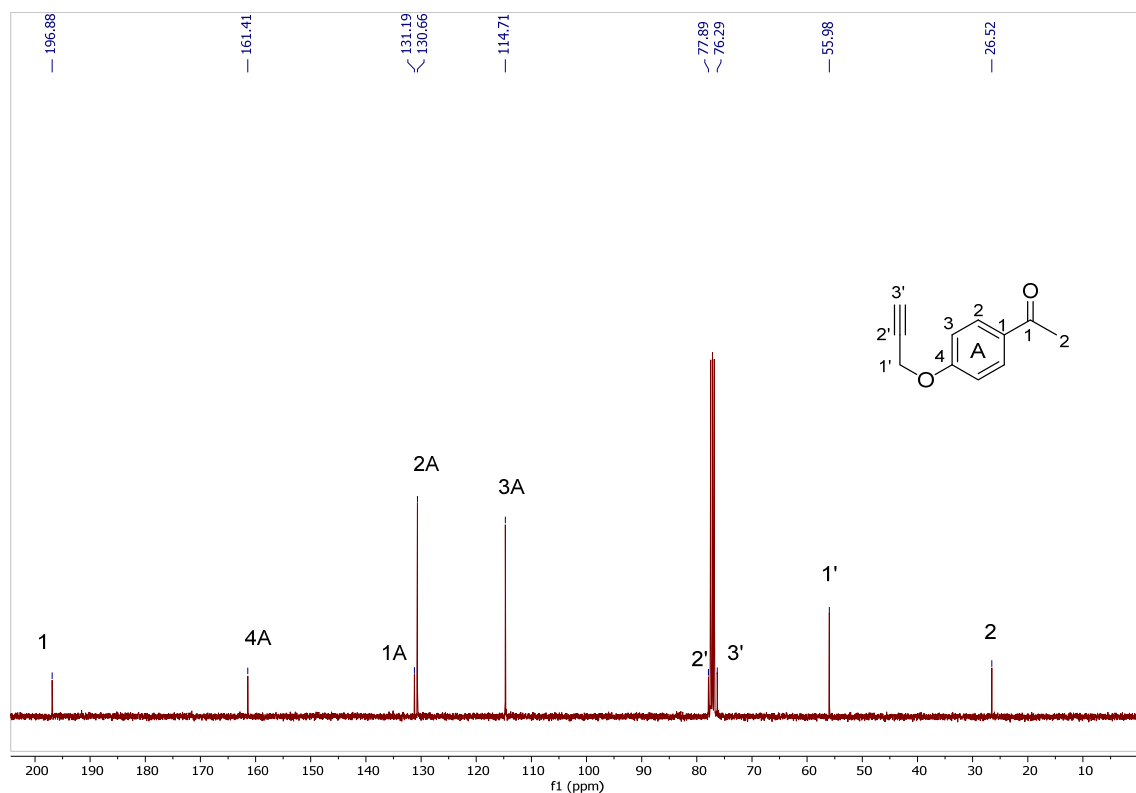

Figure S2. <sup>13</sup>C NMR of Compound 2 in CDCl<sub>3</sub>.

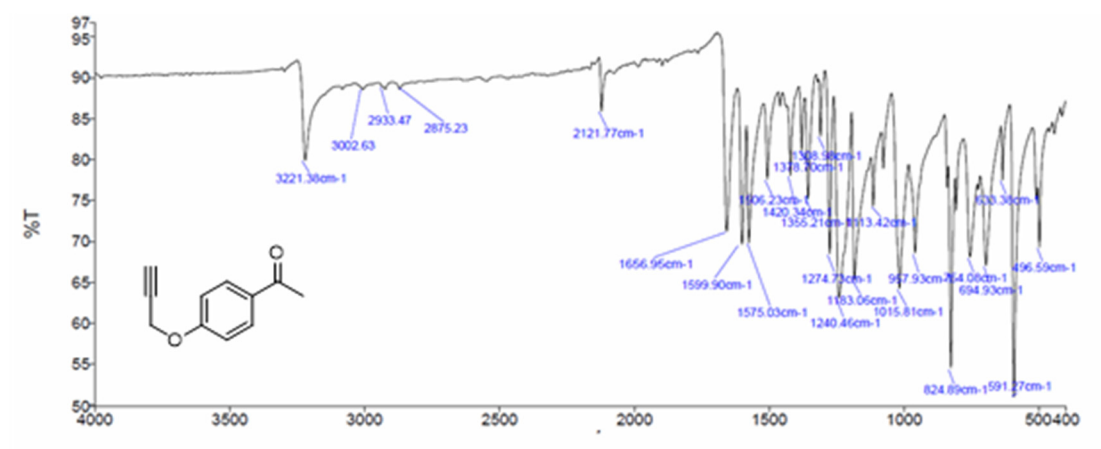

Figure S3. FTIR of Compound 2.

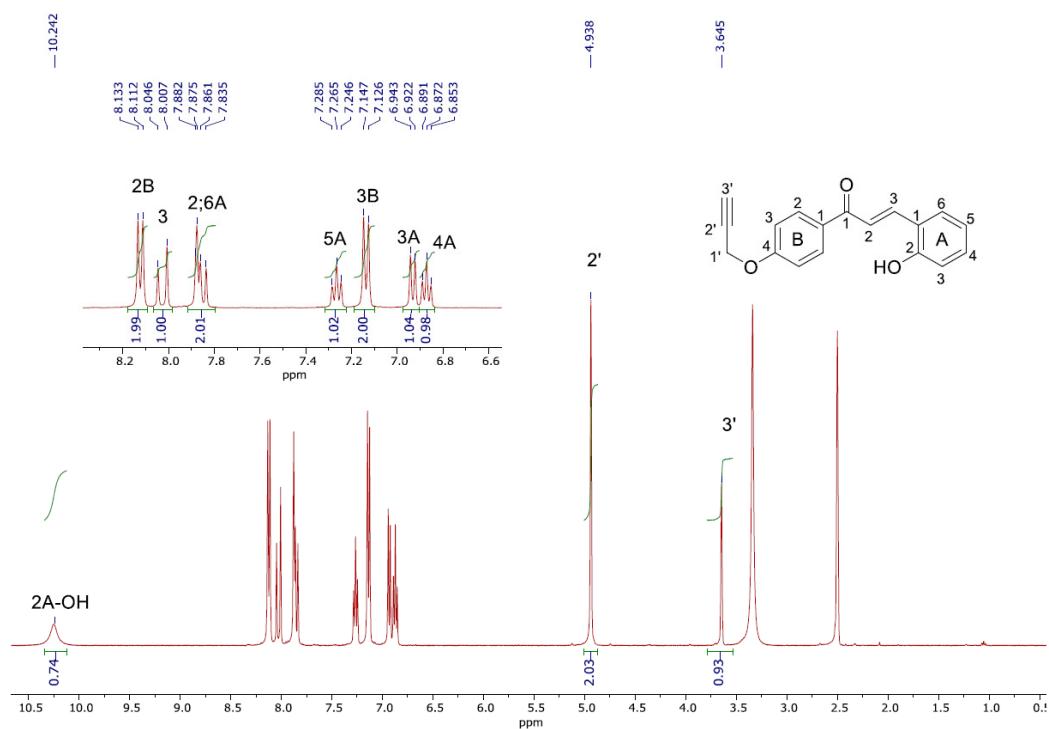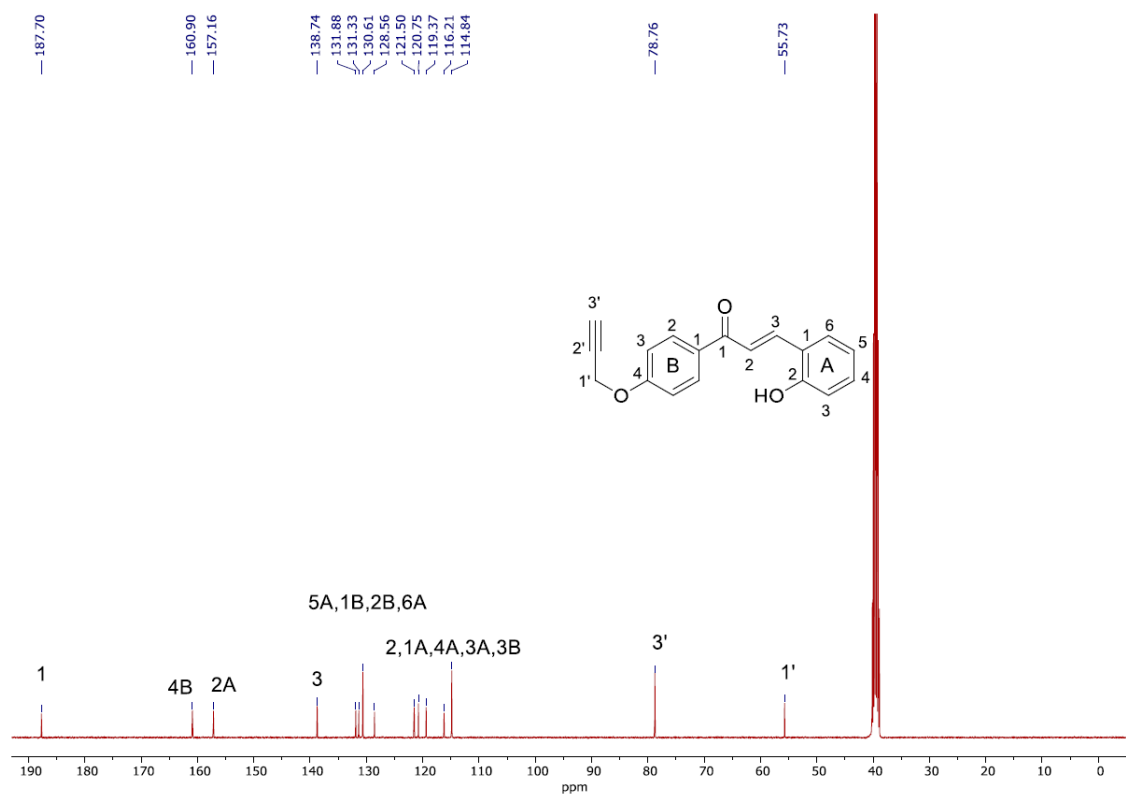

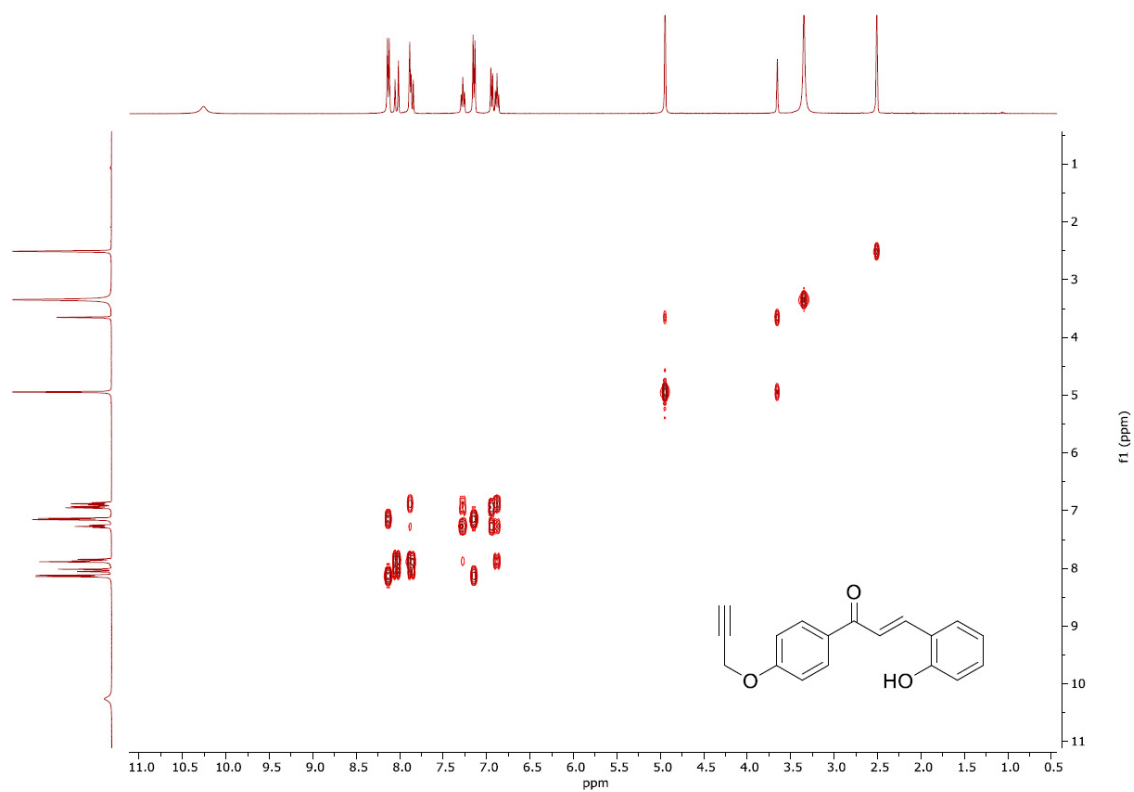Figure S6. COSY of Compound 3 in DMSO-d<sub>6</sub>.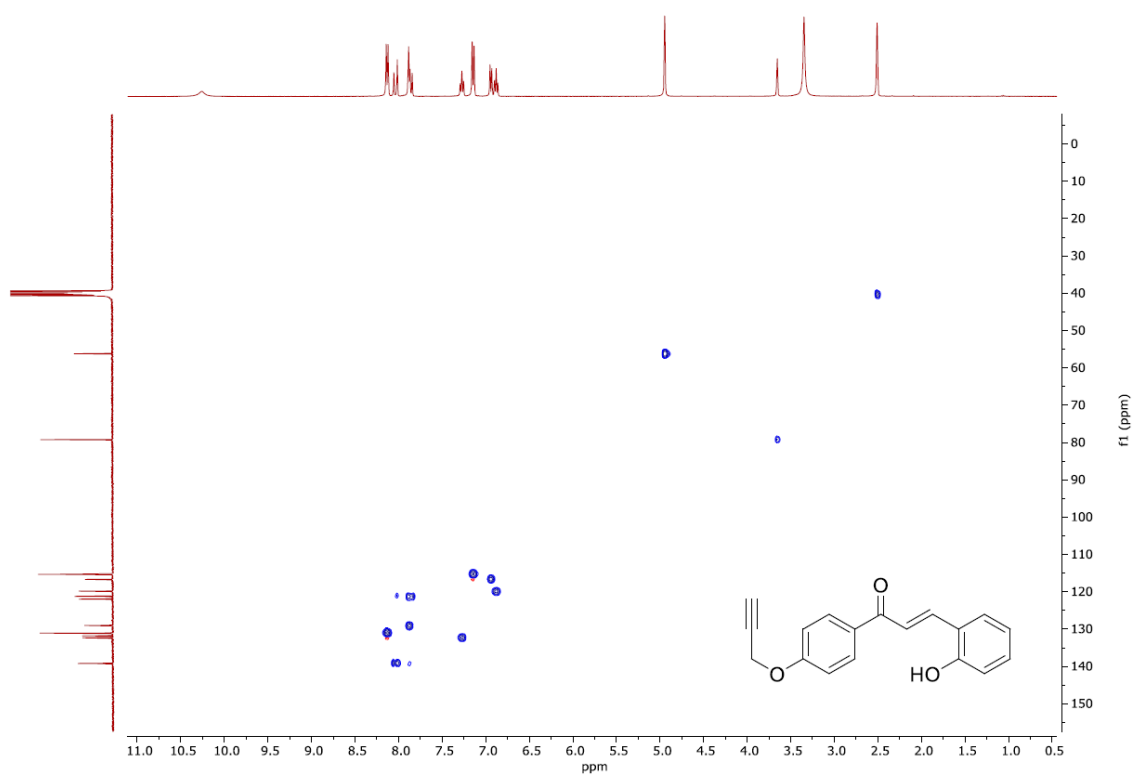Figure S7. HSQC of Compound 3 in DMSO-d<sub>6</sub>.

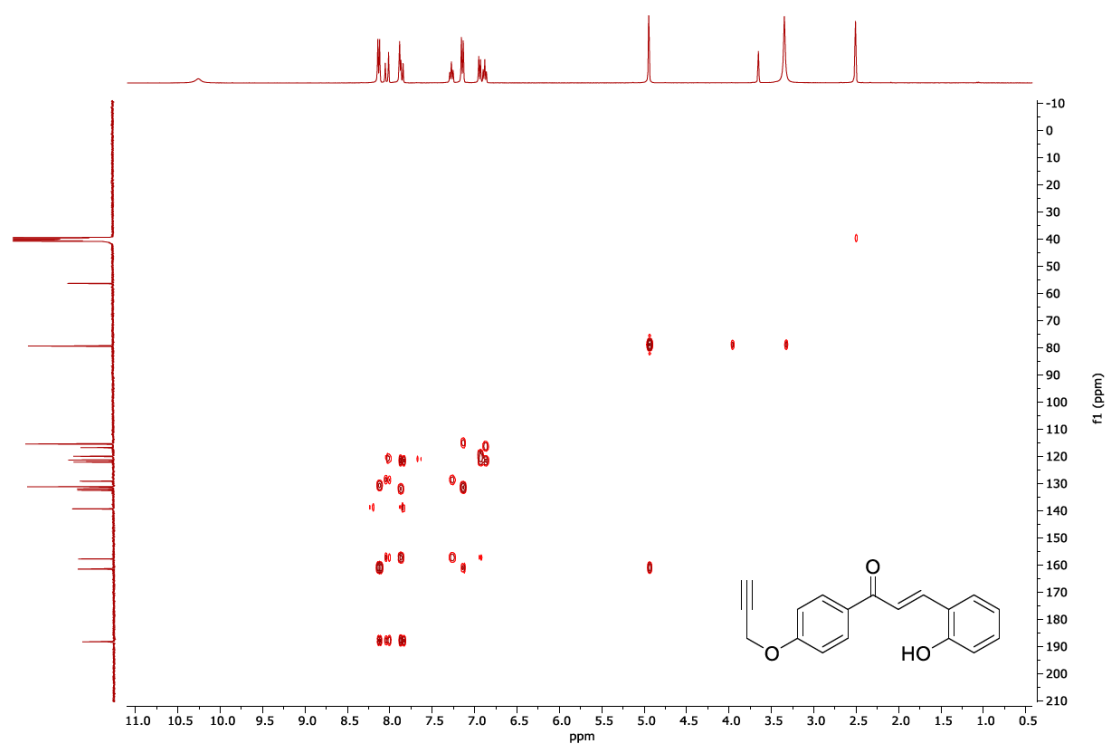Figure S8. HMBC of Compound 3 in DMSO-d<sub>6</sub>.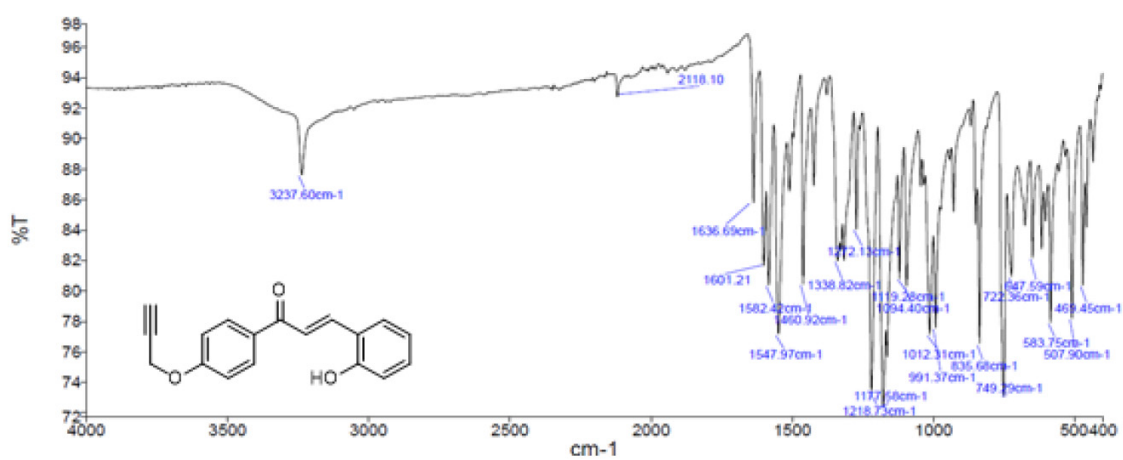

Figure S9. FTIR of Compound 3.

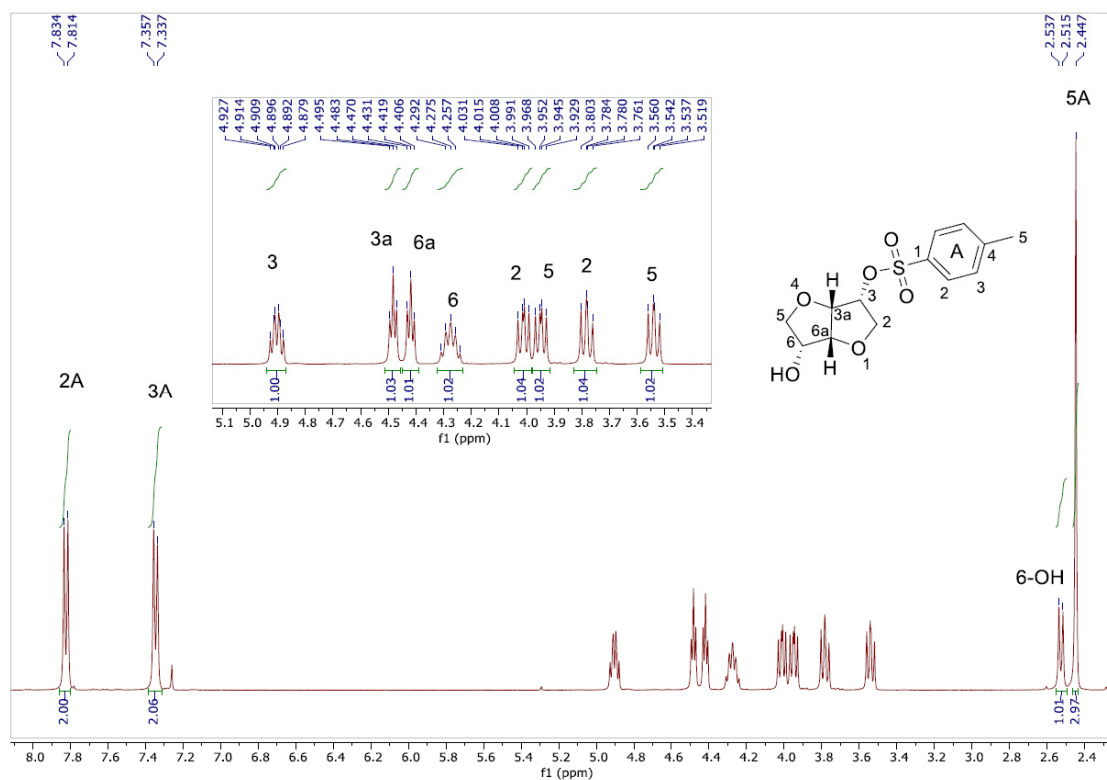

**Figure S10.**  $^1\text{H}$  NMR of Compound 5 in  $\text{CDCl}_3$ .

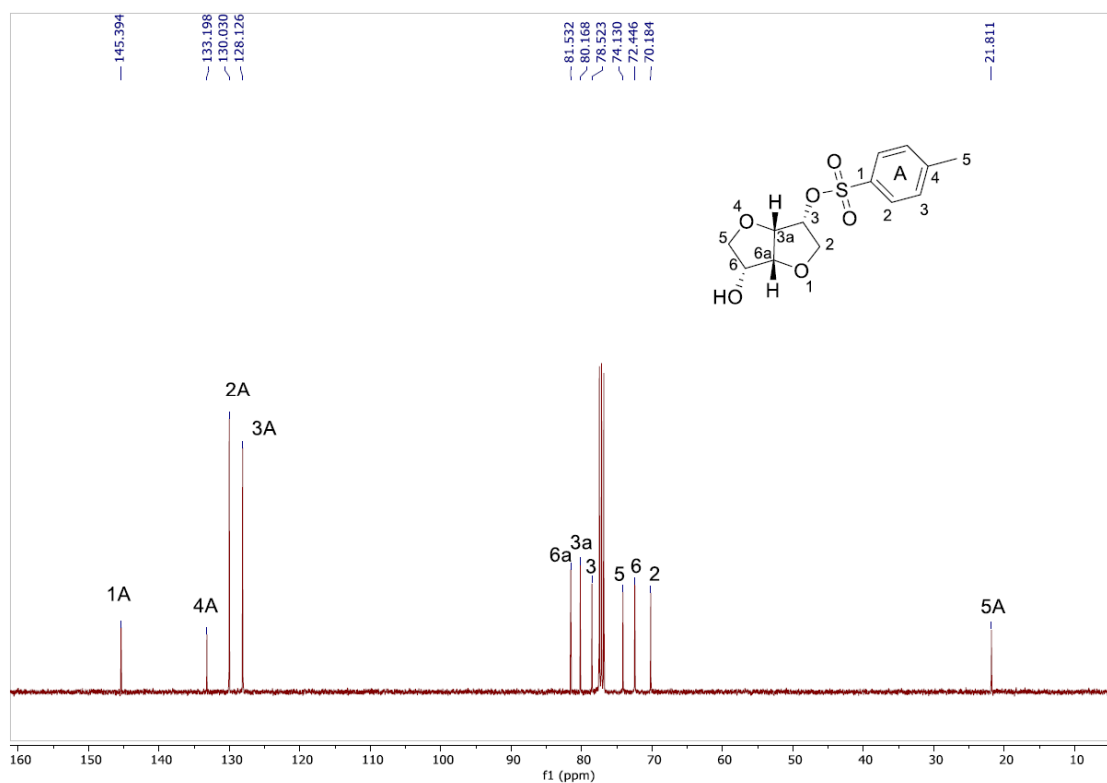

**Figure S11.**  $^{13}\text{C}$  NMR of Compound 5 in  $\text{CDCl}_3$ .

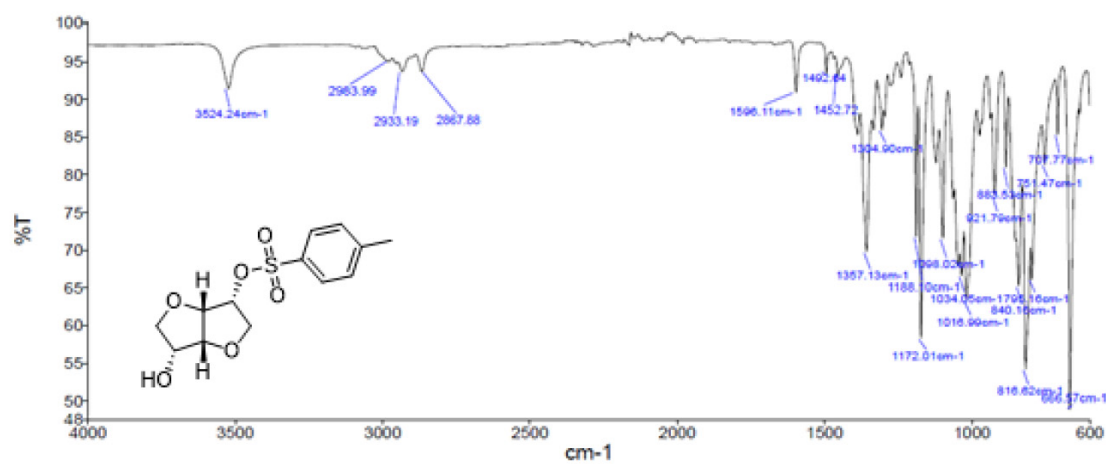

Figure S12. FTIR of Compound 5.

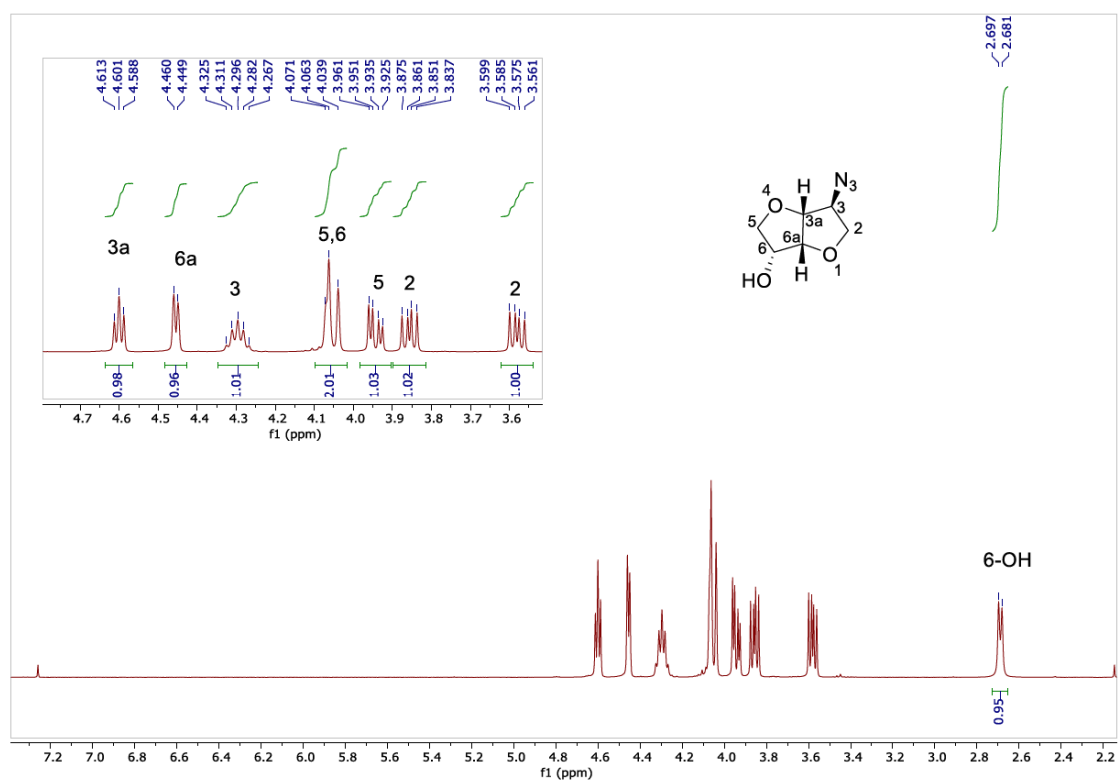Figure S13. <sup>1</sup>H NMR of Compound 6 in CDCl<sub>3</sub>.

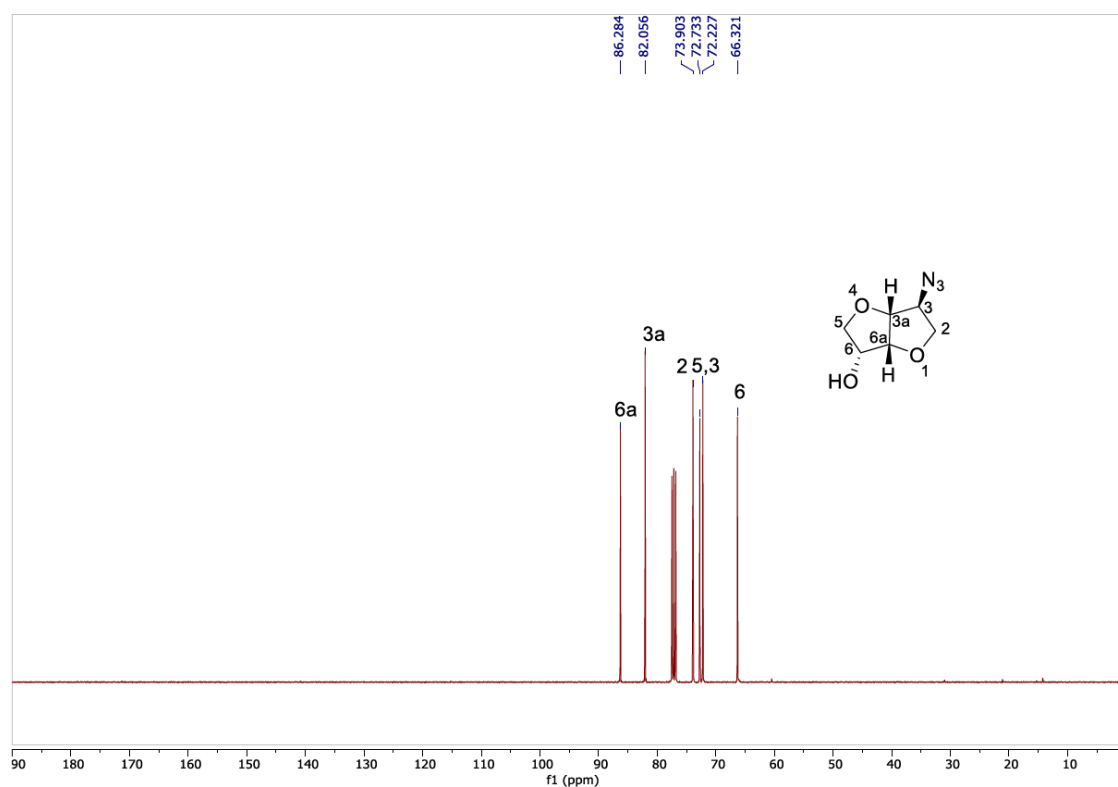Figure S14.  $^1\text{H}$  NMR of Compound 6 in  $\text{CDCl}_3$ .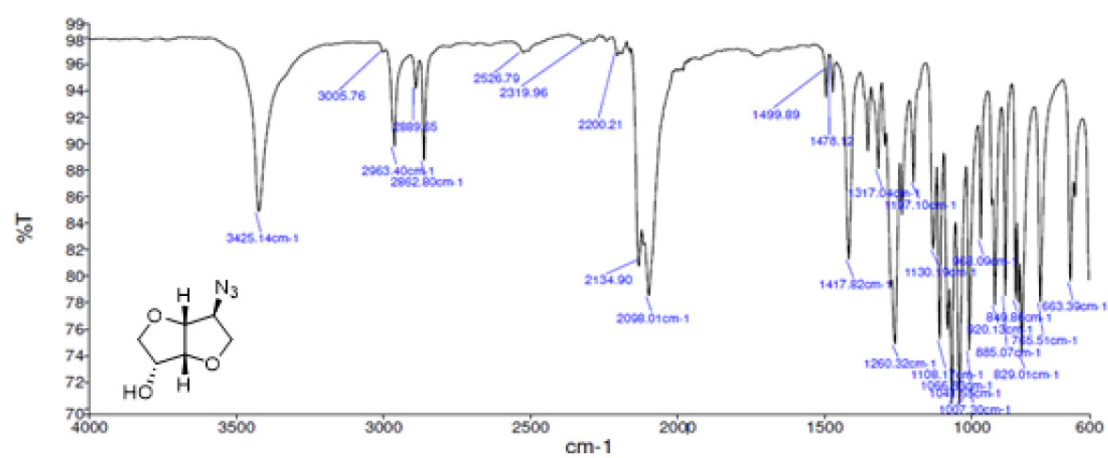

Figure S15. FTIR of Compound 6.

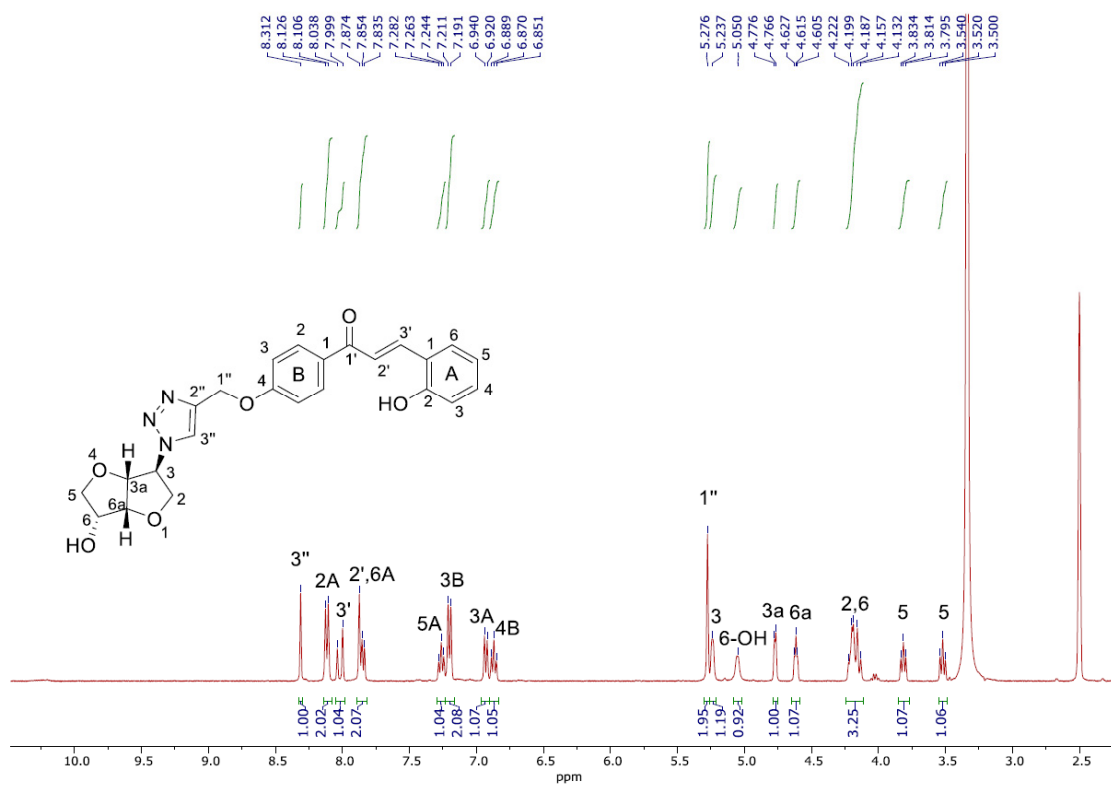Figure S16. <sup>1</sup>H NMR of Compound 7 in DMSO-d<sub>6</sub>.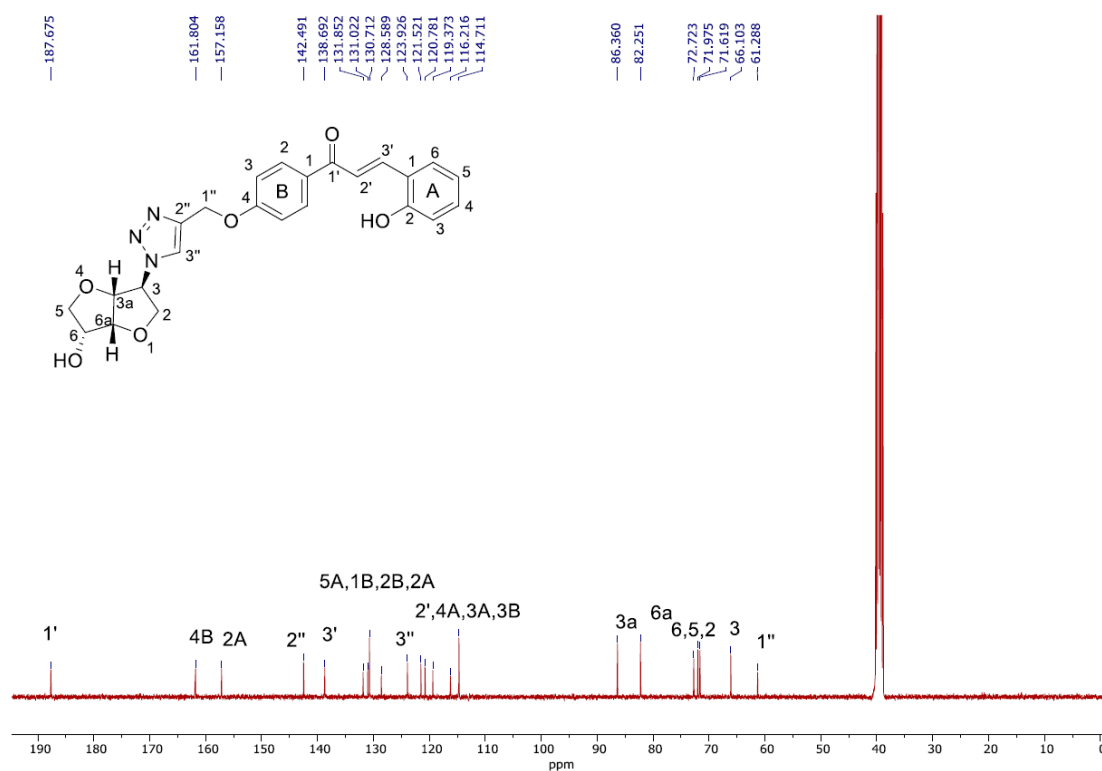Figure S17. <sup>13</sup>C NMR of Compound 7 in DMSO-d<sub>6</sub>.

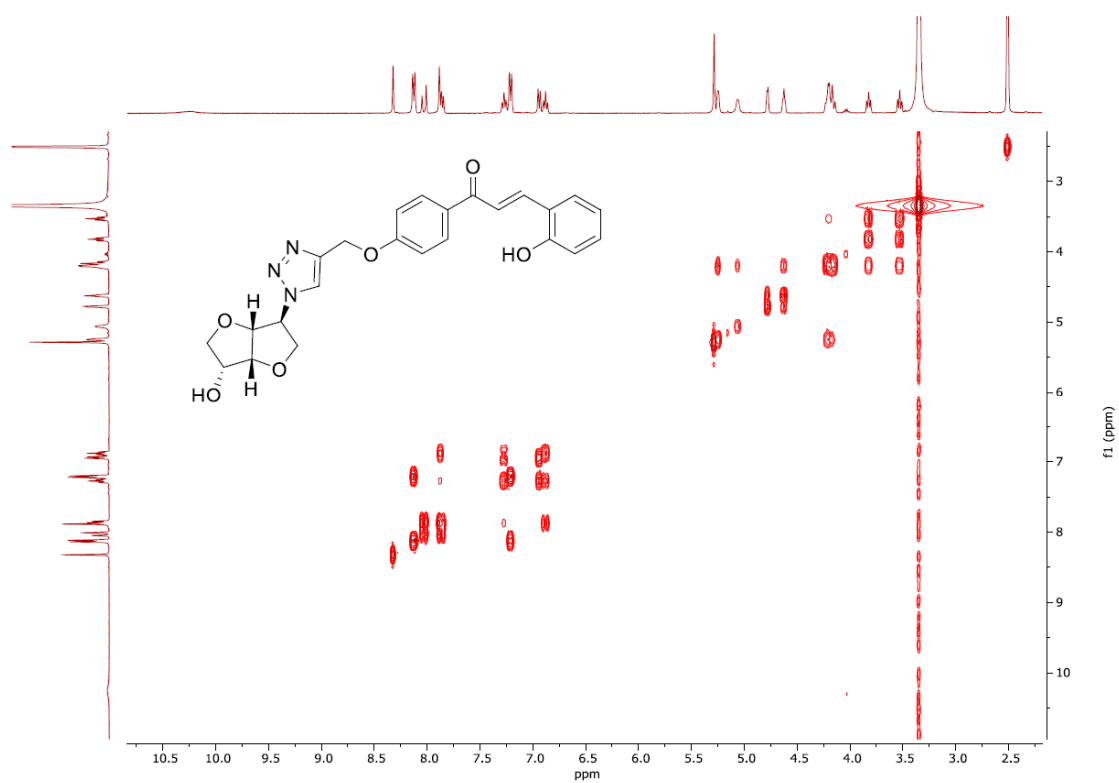

Figure S18. COSY of Compound 7 in DMSO-d<sub>6</sub>.

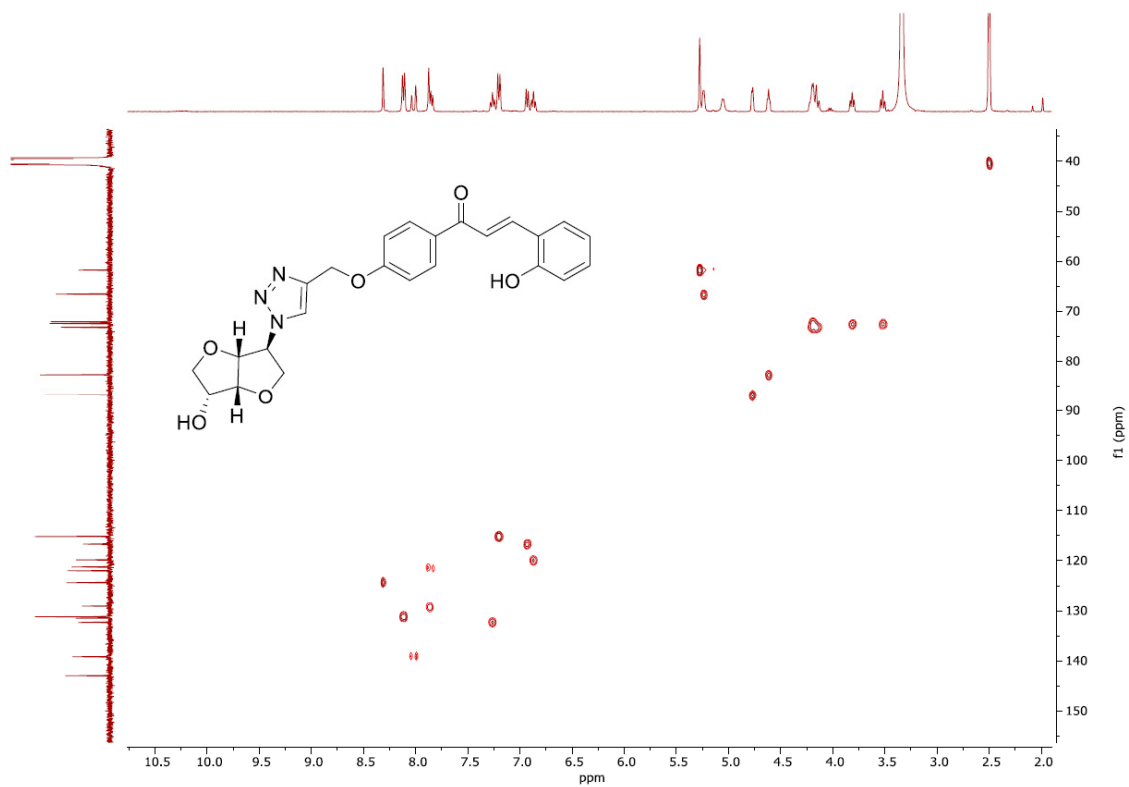

Figure S19. HSQC of Compound 7 in DMSO-d<sub>6</sub>.

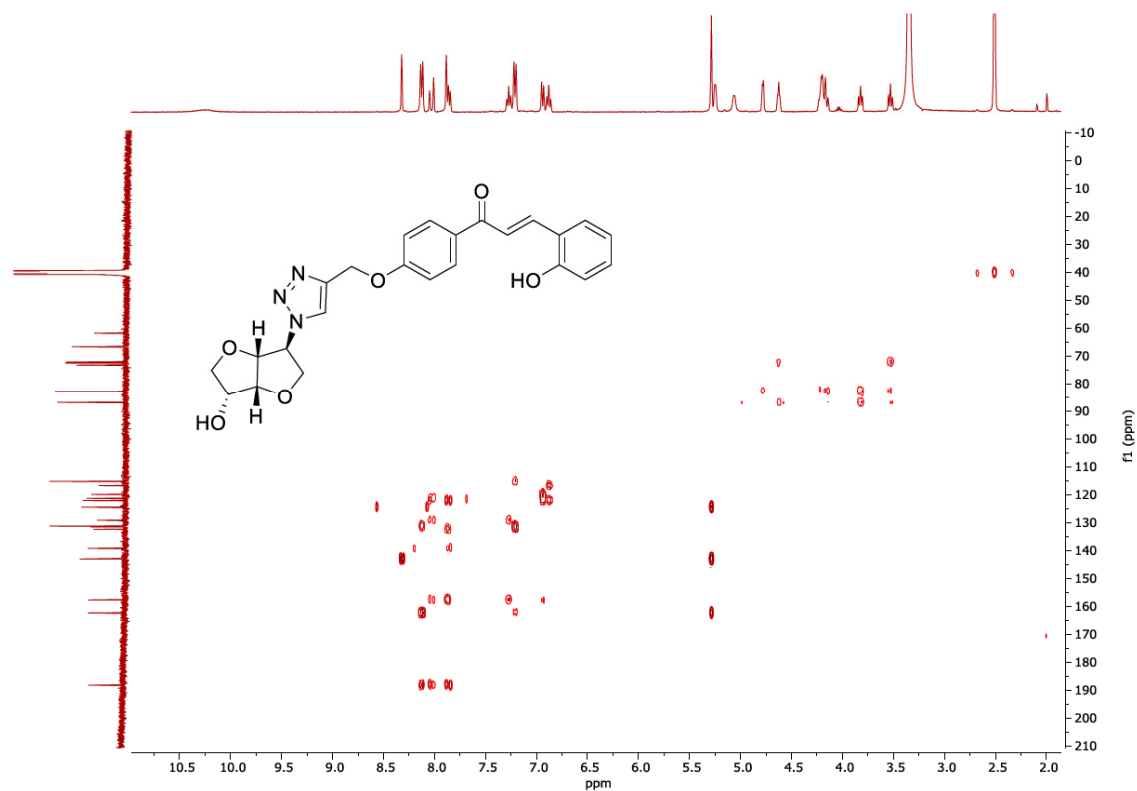Figure S20. HMBC of Compound 7 in DMSO-d<sub>6</sub>.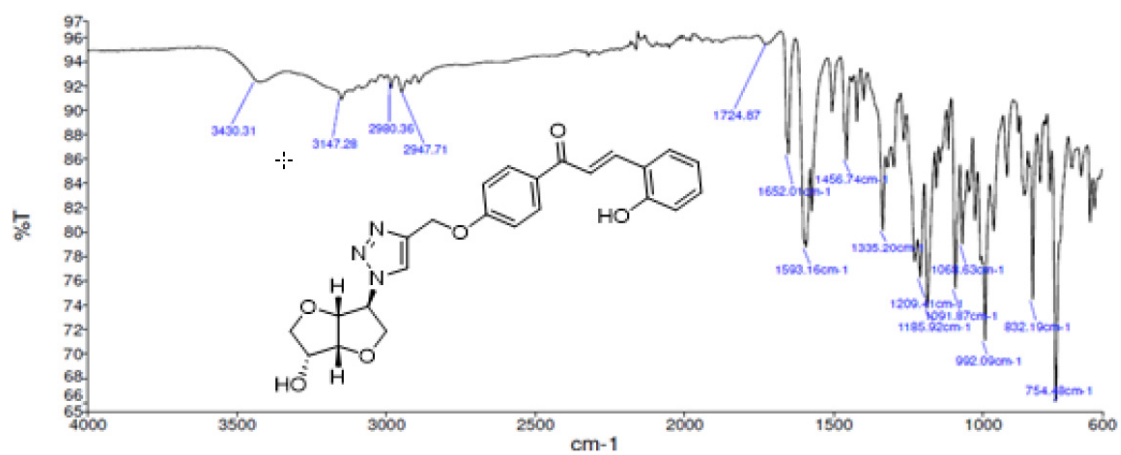

Figure S21. FTIR of Compound 7.
